# Supplementary material for: Unveiling Subtle Geographical Clines: Phenotypic Effects and Dynamics of Circadian Clock Gene Polymorphisms
Source: MDPI journal article supplement (doi:10.3390/biology12060858), 2023-06-14
Supplement: s1 [file s1]

# Mapping molecular adaptations in circadian clock and seasonal response genes of *Drosophila melanogaster*

## Supplementary Material

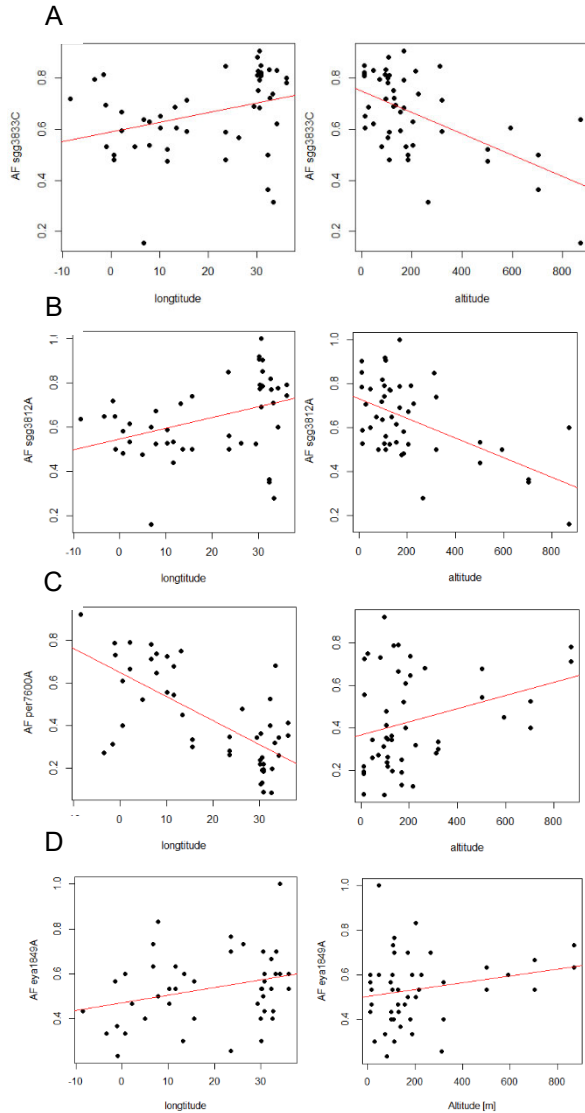

**Figure S1. Longitudinal and altitudinal clinal SNPs.** The allele frequencies (AF) of the reference allele of four SNP are shown. The regression line was drawn using a linear model. **A** sgg3833C (longitude: left, altitude: right), **B** sgg3812A **C** per7600A, **D** eya1849A. Data from Kapun et al 2020 (doi:10.1093/molbev/msaa120), of samples collected in 2014 (all seasons pooled).

**Table S1. General Linearized model (GLM) testing the effect of climatic compound variables PC1 and PC2 on SNP allele distribution.**

**sgg3812A>G**

|                    | <b>Estimate</b> | <b>Std. Error</b> | <b>z value</b> | <b>Pr(&gt; z )</b> |     |
|--------------------|-----------------|-------------------|----------------|--------------------|-----|
| <b>(Intercept)</b> | 0.63128         | 0.05816           | 10.854         | < 2e-16            | *** |
| <b>pc1</b>         | -0.05281        | 0.01912           | -2.762         | 0.00574            | **  |
| <b>pc2</b>         | -0.16601        | 0.02423           | -6.851         | 7.32e-12           | *** |

McFadden's pseudo R<sup>2</sup> = 0.16

**sgg3833C>A**

|                    | <b>Estimate</b> | <b>Std. Error</b> | <b>z value</b> | <b>Pr(&gt; z )</b> |     |
|--------------------|-----------------|-------------------|----------------|--------------------|-----|
| <b>(Intercept)</b> | 0.72996         | 0.05582           | 13.078         | < 2e-16            | *** |
| <b>pc1</b>         | -0.05271        | 0.01885           | -2.796         | 0.00517            | **  |
| <b>pc2</b>         | -0.11936        | 0.02270           | -5.258         | 1.46e-07           | *** |

McFadden's pseudo R<sup>2</sup> = 0.11

**per7600A>T**

|                    | <b>Estimate</b> | <b>Std. Error</b> | <b>z value</b> | <b>Pr(&gt; z )</b> |     |
|--------------------|-----------------|-------------------|----------------|--------------------|-----|
| <b>(Intercept)</b> | -0.24516        | 0.05298           | -4.627         | 3.71e-06           | *** |
| <b>pc1</b>         | 0.01294         | 0.01813           | 0.713          | 0.476              |     |
| <b>pc2</b>         | 0.30257         | 0.02315           | 13.069         | < 2e-16            | *** |

McFadden's pseudo R<sup>2</sup> = 0.34

**Dbt569G>T**

|                    | <b>Estimate</b> | <b>Std. Error</b> | <b>z value</b> | <b>Pr(&gt; z )</b> |     |
|--------------------|-----------------|-------------------|----------------|--------------------|-----|
| <b>(Intercept)</b> | 0.544084        | 0.046693          | 11.652         | <2e-16             | *** |
| <b>pc1</b>         | -0.025727       | 0.017477          | -1.472         | 0.141              |     |
| <b>pc2</b>         | 0.009148        | 0.018954          | 0.483          | 0.629              |     |

**Pdfr7165A>T**

|                    | <b>Estimate</b> | <b>Std. Error</b> | <b>z value</b> | <b>Pr(&gt; z )</b> |     |
|--------------------|-----------------|-------------------|----------------|--------------------|-----|
| <b>(Intercept)</b> | 0.85422         | 0.05457           | 15.653         | < 2e-16            | *** |
| <b>pc1</b>         | 0.06442         | 0.02087           | 3.087          | 0.00202            | **  |
| <b>pc2</b>         | -0.01643        | 0.02169           | -0.758         | 0.44867            |     |

eya1849A>G

|             |           | Std. Error | z value | Pr(> z ) |    |
|-------------|-----------|------------|---------|----------|----|
| Estimate    |           |            |         |          |    |
| (Intercept) | 0.146110  | 0.052850   | 2.765   | 0.0057   | ** |
| pc1         | -0.008232 | 0.018795   | -0.438  | 0.6614   |    |
| pc2         | -0.008000 | 0.021425   | -0.373  | 0.7088   |    |

Clk5472G>T

|             | Estimate | Std. Error | z value | Pr(> z ) |     |
|-------------|----------|------------|---------|----------|-----|
| (Intercept) | 1.46839  | 0.04777    | 30.739  | < 2e-16  | *** |
| pc1         | -0.07641 | 0.01520    | -5.026  | 5.01e-07 | *** |
| pc2         | -0.02645 | 0.01954    | -1.353  | 0.176    |     |

McFadden's pseudo  $R^2 = 0.08$
